# Supplementary material for: Improving management of tuberculosis in people living with HIV in South Africa through integration of HIV and tuberculosis services: a proof of concept study
Source: PubMed Central journal article supplement (PMC6137746; doi:10.1186/s12913-018-3524-9), 2018-09-14
Supplement: 12913_2018_3524_MOESM2_ESM.pdf [file 12913_2018_3524_MOESM2_ESM.pdf]

## Additional file 2: GeneXpert testing outcome

|                                                                                             | Clinic 1                                          |                | Clinic 2                                         |                | Clinic 3                                         |                | Total                          |                 |
|---------------------------------------------------------------------------------------------|---------------------------------------------------|----------------|--------------------------------------------------|----------------|--------------------------------------------------|----------------|--------------------------------|-----------------|
|                                                                                             | HIV                                               | TB             | HIV                                              | TB             | HIV                                              | TB             | HIV                            | TB              |
| <b>SCREENING – # screened for TB at the Clinic, total (n)</b>                               | 971                                               |                | 581                                              |                | 303                                              |                | 1855                           |                 |
| <b>By provider (n, percentage of number screened for TB with known provider)</b>            | 154<br>(19.8%)                                    | 623<br>(80.2%) | 177<br>(36.2%)                                   | 312<br>(73.8%) | 106<br>(41.1%)                                   | 152<br>(58.9%) | 437<br>(28.7%)                 | 1087<br>(71.3%) |
|                                                                                             | $X^2 = 149.6373$<br>$p < 0.00001$                 |                |                                                  |                |                                                  |                |                                |                 |
| <b>Unspecified provider (n, percentage of total number screened for TB)</b>                 | 194<br>(20.0%)                                    |                | 92<br>(15.8%)                                    |                | 45<br>(14.9%)                                    |                | 331<br>(17.8%)                 |                 |
| <b>TOTAL # cases with GeneXpert test(s) (n, percentage of total number screened for TB)</b> | 659<br>(67.7%)                                    |                | 402<br>(69.2%)                                   |                | 237<br>(78.2%)                                   |                | 1298<br>(69.9%)                |                 |
|                                                                                             | $X^2 = 12.0196$<br>$p = 0.0025$                   |                |                                                  |                |                                                  |                |                                |                 |
| <b>By provider</b>                                                                          | 122<br>(79.2%)                                    | 448<br>(71.9%) | 124<br>(70.1%)                                   | 215<br>(68.9%) | 82<br>(77.4%)                                    | 122<br>(80.3%) | 328<br>(75.1%)                 | 785<br>(72.2%)  |
|                                                                                             | $X^2 = 3.3767$<br>$p = 0.0661$                    |                | $X^2 = 0.0698$<br>$p = 0.7917$                   |                | $X^2 = 0.3184$<br>$p = 0.5826$                   |                | $X^2 = 1.2765$<br>$p = 0.2585$ |                 |
| <b>Unspecified provider</b>                                                                 | 89<br>(45.9%)                                     |                | 63<br>(68.5%)                                    |                | 33<br>(73.3%)                                    |                | 185<br>(55.9%)                 |                 |
| <b>POSITIVE</b>                                                                             | 66<br>(10.0)                                      |                | 38<br>(9.5)                                      |                | 11<br>(4.6)                                      |                | 115<br>(8.9)                   |                 |
|                                                                                             | $X^2 = 6.4875$<br>$p = 0.0390$                    |                |                                                  |                |                                                  |                |                                |                 |
| <b>By provider</b>                                                                          | 25<br>(20.5)                                      | 40<br>(8.9)    | 12<br>(9.7)                                      | 25<br>(11.6)   | 7<br>(8.5)                                       | 4<br>(3.3)     | 44<br>(13.4)                   | 69<br>(8.7)     |
|                                                                                             | $X^2 = 12.6901$<br>$p = 0.0004$ ( $p = 0.0006$ )* |                | $X^2 = 0.3077$<br>$p = 0.5791$ ( $p = 0.5954$ )* |                | $X^2 = 2.6575$<br>$p = 0.1031$ ( $p = 0.1218$ )* |                | $X^2 = 5.4244$<br>$p = 0.0199$ |                 |
| <b>Unspecified provider</b>                                                                 | 1<br>(1.5%)                                       |                | 1<br>(2.6%)                                      |                | 0<br>(0.0%)                                      |                | 2<br>(1.7%)                    |                 |

|                             | Clinic 1                                 |                | Clinic 2                                 |                | Clinic 3                      |                | Total                          |                |
|-----------------------------|------------------------------------------|----------------|------------------------------------------|----------------|-------------------------------|----------------|--------------------------------|----------------|
|                             | HIV                                      | TB             | HIV                                      | TB             | HIV                           | TB             | HIV                            | TB             |
| <b>NEGATIVE</b>             | 576<br>(87.4%)                           |                | 353<br>(87.8%)                           |                | 221<br>(93.2%)                |                | 1150<br>(88.6%)                |                |
|                             | $X^2 = 6.2495$<br>$p = 0.0439$           |                |                                          |                |                               |                |                                |                |
| <b>By provider</b>          | 93<br>(76.2%)                            | 399<br>(89.1%) | 107<br>(86.3%)                           | 184<br>(85.6%) | 75<br>(91.5%)                 | 114<br>(93.4%) | 275<br>(83.8%)                 | 697<br>(88.8%) |
|                             | $X^2 = 13.3693$<br>$p = 0.0003$          |                | $X^2 = 0.0325$<br>$p = 0.8568$           |                | $X^2 = 0.282$<br>$p = 0.5954$ |                | $X^2 = 5.1200$<br>$p = 0.0236$ |                |
| <b>Unspecified provider</b> | 84<br>(94.4%)                            |                | 62<br>(98.4%)                            |                | 32<br>(97.0%)                 |                | 178<br>(96.2%)                 |                |
| <b>UNSUCCESSFUL</b>         | 13<br>(2.0%)                             |                | 9<br>(2.2%)                              |                | 4<br>(1.7%)                   |                | 26<br>(2.0%)                   |                |
|                             | $X^2 = 0.2369$<br>$p = 0.8882$           |                |                                          |                |                               |                |                                |                |
| <b>By provider</b>          | 3<br>(2.5%)                              | 7<br>(1.6%)    | 4<br>(3.2%)                              | 5<br>(2.3%)    | 0<br>(0.0%)                   | 3<br>(2.5%)    | 7<br>(2.1%)                    | 15<br>(1.9%)   |
|                             | $X^2 = 0.4471$<br>$p = 0.5037$           |                | $X^2 = 0.2466$<br>$p = 0.6194$           |                | $p = 0.2753^*$                |                | $X^2 = 0.0595$<br>$p = 0.8072$ |                |
| <b>Unspecified provider</b> | 3<br>(3.4%)                              |                | 0<br>(0.0%)                              |                | 1<br>(3.0%)                   |                | 4<br>(2.2%)                    |                |
| <b>UNKNOWN RESULT</b>       | 4<br>(0.6%)                              |                | 2<br>(0.5%)                              |                | 1<br>(0.4%)                   |                | 7<br>(0.5%)                    |                |
|                             | $X^2 = 0.1302$<br>$p = 0.9370$           |                |                                          |                |                               |                |                                |                |
| <b>By provider</b>          | 1<br>(0.8%)                              | 2<br>(0.4%)    | 1<br>(0.8%)                              | 1<br>(0.5%)    | 0<br>(0.0%)                   | 1<br>(0.8%)    | 2<br>(0.6%)                    | 4<br>(0.5%)    |
|                             | $X^2 = 0.2551$<br>$p = 0.6135 (p = 1)^*$ |                | $X^2 = 0.1562$<br>$p = 0.6927 (p = 1)^*$ |                | $p = 1^*$                     |                | $X^2 = 0.0433$<br>$p = 0.8351$ |                |
| <b>Unspecified provider</b> | 1<br>(1.1%)                              |                | 0<br>(0.0%)                              |                | 0<br>(0.0%)                   |                | 1<br>(0.5%)                    |                |

\* Fisher's Exact Test (two tailed)
