# Supplementary material for: Improving management of tuberculosis in people living with HIV in South Africa through integration of HIV and tuberculosis services: a proof of concept study
Source: PubMed Central journal article supplement (PMC6137746; doi:10.1186/s12913-018-3524-9), 2018-09-14
Supplement: 12913_2018_3524_MOESM4_ESM.pdf [file 12913_2018_3524_MOESM4_ESM.pdf]

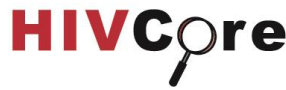

**Provider/program-manager questionnaire**

|                                                 |                                                                                                                                                                                                                     |                                                                                                                                                          |                           |
|-------------------------------------------------|---------------------------------------------------------------------------------------------------------------------------------------------------------------------------------------------------------------------|----------------------------------------------------------------------------------------------------------------------------------------------------------|---------------------------|
| 1.                                              | In what year did you begin working for the Department of Health (in any capacity, in any facility)? [If cannot remember exact year – was it less than 5 years ago or more than 5 years ago?]                        | Year: _____<br>Less than 5 years ago ... 1<br>More than 5 years ago ... 2                                                                                |                           |
| 2.                                              | In what year did you begin working in this facility (in any capacity)? [If cannot remember exact year – was it less than 5 years ago or more than 5 years ago?]                                                     | Year: _____<br>Less than 5 years ago ... 1<br>More than 5 years ago ... 2                                                                                |                           |
| 3.                                              | What is your <i>primary</i> responsibility at this facility – do you spend most of your time providing services to patients or managing the facility or supervising staff?                                          | Providing services ..... 1<br>-----<br>Managing/supervising .... 2                                                                                       | → 6<br>-----<br>Continue  |
| 4.                                              | In addition to management/supervision, <i>in the last two weeks</i> did you provide any services to a patient, such as examination, ordering tests and/or prescribing medication?                                   | Yes..... 1<br>-----<br>No ..... 2<br>Don't remember ..... 8                                                                                              | -----<br>→ 30             |
| 5.                                              | Were any of these patients being seen for HIV or tuberculosis?                                                                                                                                                      | Yes..... 1<br>-----<br>No ..... 2<br>Don't remember ..... 8                                                                                              | Continue<br>-----<br>→ 30 |
| <b>Questions 6-29 are for service providers</b> |                                                                                                                                                                                                                     |                                                                                                                                                          |                           |
| 6.                                              | <i>In the last two weeks</i> , did you personally conduct any HIV rapid test (Fingerprick sample) in this facility?                                                                                                 | Yes..... 1<br>No ..... 2<br>Don't remember ..... 8                                                                                                       |                           |
| 7.                                              | <i>In the last two weeks</i> , did you <u>personally collect any blood specimens</u> to be sent to the National Health Laboratory Service for any other HIV tests, such as HIV ELISA test, CD4, viral load?         | Yes..... 1<br>No ..... 2<br>Don't remember ..... 8                                                                                                       |                           |
| 8.                                              | <i>In the last two weeks</i> , did you <u>personally collect any sputum specimens</u> to be sent to the National Health Laboratory Service for suspected TB or to monitor a TB patient on treatment or retreatment? | Yes..... 1<br>No ..... 2<br>Don't remember ..... 8                                                                                                       | Continue<br>→ 10<br>→ 11  |
| 9.                                              | Did you have any difficulties collecting sputum specimens? What difficulty did you have? Any other difficulty? [Mark all mentioned]                                                                                 | Pt could not cough ..... A<br>Patient refused ..... B<br>No supplies on hand .... C<br>Other ..... X<br>Don't remember ..... Y<br>No difficulties..... Z | All:<br>→ 11              |

|    |                                                                                                                                                                                                                           |                                                                                                                                                                                                                                                                                                    |               |
|----|---------------------------------------------------------------------------------------------------------------------------------------------------------------------------------------------------------------------------|----------------------------------------------------------------------------------------------------------------------------------------------------------------------------------------------------------------------------------------------------------------------------------------------------|---------------|
| 10 | Why did you not collect any sputum specimens? Any other reason? [Mark all mentioned]                                                                                                                                      | Pt could not cough ..... A<br>Patient refused ..... B<br>No supplies on hand ..... C<br>Not my responsibility ..... D<br>No patients needed TB test ..... E<br>Don't know how to collect sputum ..... F<br>Referred to another service provider ..... F<br>Other ..... X<br>Don't remember ..... Y |               |
| 11 | <i>In the last two weeks, did you refer any patient to another service provider to collect specimens for any of the following tests:</i>                                                                                  |                                                                                                                                                                                                                                                                                                    |               |
|    | HIV rapid test                                                                                                                                                                                                            | [ ] Yes [ ] No [ ] DR                                                                                                                                                                                                                                                                              |               |
|    | Other HIV tests, such as CD4, viral load (blood)                                                                                                                                                                          | [ ] Yes [ ] No [ ] DR                                                                                                                                                                                                                                                                              |               |
|    | Sputum for suspected TB                                                                                                                                                                                                   | [ ] Yes [ ] No [ ] DR                                                                                                                                                                                                                                                                              |               |
|    | Sputum for smear or culture (TB patient on treatment or retreatment)                                                                                                                                                      | [ ] Yes [ ] No [ ] DR                                                                                                                                                                                                                                                                              |               |
| 12 | <i>In the last two weeks, did you receive or review any report from the National Health Laboratory Service for any HIV test (HIV ELISA test, CD4, viral load)?</i>                                                        | Yes..... 1<br>-----<br>No .....2<br>Don't remember .....8                                                                                                                                                                                                                                          | -----<br>→ 15 |
| 13 | Were the reports ( <u>any HIV test</u> [HIV ELISA test, CD4, viral load]) already in the patient's medical record or did you have to go looking for them?                                                                 | In medical record.....1<br>Had to look for it.....2<br>Both .....3<br>Don't remember .....8                                                                                                                                                                                                        |               |
| 14 | How were the reports ( <u>any HIV test</u> [HIV ELISA test, CD4, viral load]) prepared – on the form delivered by NHLS, on the SMS printer here in the facility, a hand-written note? Anything else? [Mark all mentioned] | NHLS form ..... 1<br>SMS printer tape .....2<br>Hand-written note.....3<br>Other .....7<br>Don't remember .....8                                                                                                                                                                                   |               |
| 15 | <i>In the last two weeks, did you personally contact the National Health Laboratory Service for any HIV test result (HIV ELISA test, CD4, viral load) because you could not find it at the facility?</i>                  | Yes..... 1<br>-----<br>No .....2<br>Don't remember .....8                                                                                                                                                                                                                                          | -----<br>→ 17 |
| 16 | How did you contact NHLS – did you use a barcode scanner, your personal phone, the facility phone? Anything else? [Mark all mentioned]                                                                                    | Barcode scanner ..... 1<br>Personal phone .....2<br>Facility phone .....3<br>Other .....7<br>Don't remember .....8                                                                                                                                                                                 |               |

|    |                                                                                                                                                                                                                             |                                                                                                                   |                          |
|----|-----------------------------------------------------------------------------------------------------------------------------------------------------------------------------------------------------------------------------|-------------------------------------------------------------------------------------------------------------------|--------------------------|
| 17 | <i>In the last two weeks, did you receive or review any report from the National Health Laboratory Service for any TB test (Xpert, smear microscopy/culture)?</i>                                                           | Yes..... 1<br>-----<br>No .....2<br>Don't remember .....8                                                         | -----<br>→ 20            |
| 18 | Were the reports ( <u>any TB test</u> [Xpert, smear microscopy/culture]) already in the patient's medical record or did you have to go looking for them?                                                                    | In medical record..... 1<br>Had to look for it.....2<br>Both .....3<br>Don't remember .....8                      |                          |
| 19 | How were the reports ( <u>any TB test</u> [Xpert, smear microscopy/culture]) prepared – on the form delivered by NHLS, on the SMS printer here in the facility, a hand-written note? Anything else? [Mark all mentioned]    | NHLS form ..... 1<br>SMS printer tape .....2<br>Hand-written note.....3<br>Other .....7<br>Don't remember .....8  |                          |
| 20 | <i>In the last two weeks, did you personally contact the National Health Laboratory Service for any <u>TB test result</u> (Xpert, smear microscopy/culture) because you could not find it at the facility?</i>              | Yes..... 1<br>-----<br>No .....2<br>Don't remember .....8                                                         | -----<br>→ 22            |
| 21 | How did you contact NHLS – did you use a barcode scanner, your personal phone, the facility phone? Anything else? [Mark all mentioned]                                                                                      | Barcode scanner ..... 1<br>Personal phone.....2<br>Facility phone .....3<br>Other .....7<br>Don't remember .....8 |                          |
| 22 | There are various ways for service providers to get test results from NHLS. If it were totally up to you, which would be your <u>most</u> preferred method: paper report, barcode scanner, cell phone or computer/internet? | Paper report..... 1<br>Barcode scanner .....2<br>Cell phone.....3<br>Computer/Internet .....4                     |                          |
| 23 | Why is that? (open-ended)                                                                                                                                                                                                   |                                                                                                                   |                          |
| 24 | And if it were totally up to you, which would be your <u>least</u> preferred method to get results from NHLS: paper report, barcode scanner, cell phone, or computer/internet?                                              | Paper report..... 1<br>Barcode scanner .....2<br>Cell phone.....3<br>Computer/Internet .....4                     |                          |
| 25 | Why is that? (open-ended)                                                                                                                                                                                                   |                                                                                                                   |                          |
| 26 | <b>FILTER.</b> Check Question 3                                                                                                                                                                                             | Service provider ..... 1<br>Manager/supervisor .....2                                                             | → 30                     |
| 27 | <i>In your current position at this facility, do you care primarily for HIV patients or for TB patients?</i>                                                                                                                | TB patients..... 1<br>-----<br>HIV patients .....2<br>Both equally .....3<br>Rotating system .....4               | →29<br>-----<br>Continue |
| 28 | How often do you provide or prescribe TB treatment for your HIV patients who are co-infected with TB – would you say rarely, sometimes or almost always?                                                                    | Rarely ..... 1<br>Sometimes .....2<br>Almost always .....3                                                        | All:<br>→ 40             |
| 29 | How often do you provide or prescribe HIV treatment for your TB patients who are co-infected with HIV – would you say rarely, sometimes or almost always?                                                                   | Rarely ..... 1<br>Sometimes .....2<br>Almost always .....3                                                        | All:<br>→ 40             |

| Questions 30-39 are for managers and supervisors |                                                                                                                                                                                                                                       |                                                                                                                              |               |
|--------------------------------------------------|---------------------------------------------------------------------------------------------------------------------------------------------------------------------------------------------------------------------------------------|------------------------------------------------------------------------------------------------------------------------------|---------------|
| 30                                               | When TB test results come back from NHLS to this facility, who is responsible for getting the form back to the provider who ordered the TB test?                                                                                      | Reception/file clerk..... 1<br>Ordering provider .....2<br>Other.....7                                                       |               |
| 31                                               | What is the general turn-around time for getting TB results back from NHLS?                                                                                                                                                           | Within 24 hours ..... 1<br>24-48 hours.....2<br>48-72 hours.....3<br>More than 72 hours ..... 4<br>Don't know/no opinion ..8 |               |
| 32                                               | Did this facility receive an SMS printer from NHLS as part of the roll-out of GeneXpert testing for TB?                                                                                                                               | Yes..... 1<br>-----<br>No .....2<br>Don't know .....8                                                                        | -----<br>→ 34 |
| 33                                               | What is the current status of the SMS printer received from NHLS?                                                                                                                                                                     | Still here and working .... 1<br>Still here but not working 2<br>Sent to another facility ....3<br>Don't know .....8         |               |
| 34                                               | <i>In the last three months</i> , in your capacity as manager or supervisor, did you personally contact the National Health Laboratory Service for any test result because it could not be found at the facility?                     | Yes..... 1<br>-----<br>No .....2<br>Don't remember .....8                                                                    | -----<br>→ 36 |
| 35                                               | How did you contact NHLS – did you use a barcode scanner, your personal phone, the facility phone? Anything else? [Mark all mentioned]                                                                                                | Barcode scanner ..... 1<br>Personal phone .....2<br>Facility phone .....3<br>Other .....7<br>Don't remember .....8           |               |
| 36                                               | There are various ways for facilities and providers to receive test results from NHLS. As a manager or supervisor, which method do you feel is <u>most</u> reliable: paper report, barcode scanner, cell phone, or computer/internet? | Paper report ..... 1<br>Barcode scanner .....2<br>Cell phone .....3<br>Computer/Internet ..... 4                             |               |
| 37                                               | Why is that? (open-ended)                                                                                                                                                                                                             |                                                                                                                              |               |
| 38                                               | And which method do you feel is <u>least</u> reliable: paper report, barcode scanner, cell phone, or computer/internet?                                                                                                               | Paper report ..... 1<br>Barcode scanner .....2<br>Cell phone .....3<br>Computer/Internet ..... 4                             |               |
| 39                                               | Why is that? (open-ended)                                                                                                                                                                                                             |                                                                                                                              |               |
| Questions 40-51 are for all respondents          |                                                                                                                                                                                                                                       |                                                                                                                              |               |
| 40                                               | <i>In the last 12 months</i> , did you receive or participate in any training or refresher training in <u>HIV</u> testing and management (by Dept. of Health, NHLS or another accredited institution)?                                | Yes..... 1<br>No .....2<br>Don't remember .....8                                                                             |               |

| 41                                                                                                                                                        | In the last 12 months, did you receive or participate in any training or refresher training in TB testing and management, including collecting sputum specimens (by Dept. of Health, NHLS or another accredited institution)?       | Yes..... 1<br>No .....2<br>Don't remember .....8                                                                                                                                                                                                                                                                                                |                                                                                                                                                                                                                                                                                                                                                                                                                                                                                                                                                                                                                                                                                                                                                                                                                                                                                                                                                                                                                                                                                                                                                                                                                                                                                                                                                               |               |                        |            |              |               |                        |                                                                              |  |  |  |  |  |                                                                                                                                                           |  |  |  |  |  |                                                                                                                                             |  |  |  |  |  |                                                                                                                                           |  |  |  |  |  |
|-----------------------------------------------------------------------------------------------------------------------------------------------------------|-------------------------------------------------------------------------------------------------------------------------------------------------------------------------------------------------------------------------------------|-------------------------------------------------------------------------------------------------------------------------------------------------------------------------------------------------------------------------------------------------------------------------------------------------------------------------------------------------|---------------------------------------------------------------------------------------------------------------------------------------------------------------------------------------------------------------------------------------------------------------------------------------------------------------------------------------------------------------------------------------------------------------------------------------------------------------------------------------------------------------------------------------------------------------------------------------------------------------------------------------------------------------------------------------------------------------------------------------------------------------------------------------------------------------------------------------------------------------------------------------------------------------------------------------------------------------------------------------------------------------------------------------------------------------------------------------------------------------------------------------------------------------------------------------------------------------------------------------------------------------------------------------------------------------------------------------------------------------|---------------|------------------------|------------|--------------|---------------|------------------------|------------------------------------------------------------------------------|--|--|--|--|--|-----------------------------------------------------------------------------------------------------------------------------------------------------------|--|--|--|--|--|---------------------------------------------------------------------------------------------------------------------------------------------|--|--|--|--|--|-------------------------------------------------------------------------------------------------------------------------------------------|--|--|--|--|--|
| 42                                                                                                                                                        | This facility provides care and treatment for HIV patients. Which HIV patients should be tested for TB, that is, should have their sputum collected and sent to NHLS? Any others? [Check all mentioned]                             | All with cough..... A<br>All with fever..... B<br>All with night sweats..... C<br>All with weight loss ..... D<br>All not yet on ART (Wellness patients)..... E<br>All starting on ART .....F<br>All newly (3 months) on ART..... G<br>All HIV patients, regardless of symptoms or status ..... H<br>Other..... X<br>Don't know/no opinion... Y |                                                                                                                                                                                                                                                                                                                                                                                                                                                                                                                                                                                                                                                                                                                                                                                                                                                                                                                                                                                                                                                                                                                                                                                                                                                                                                                                                               |               |                        |            |              |               |                        |                                                                              |  |  |  |  |  |                                                                                                                                                           |  |  |  |  |  |                                                                                                                                             |  |  |  |  |  |                                                                                                                                           |  |  |  |  |  |
| 43                                                                                                                                                        | What percentage of new HIV patients who enroll for care and treatment at this facility are likely to have active TB?                                                                                                                | ____ %<br>Almost none .....775<br>Almost all .....776<br>Don't know/no opinion 888                                                                                                                                                                                                                                                              |                                                                                                                                                                                                                                                                                                                                                                                                                                                                                                                                                                                                                                                                                                                                                                                                                                                                                                                                                                                                                                                                                                                                                                                                                                                                                                                                                               |               |                        |            |              |               |                        |                                                                              |  |  |  |  |  |                                                                                                                                                           |  |  |  |  |  |                                                                                                                                             |  |  |  |  |  |                                                                                                                                           |  |  |  |  |  |
| 44                                                                                                                                                        | On a scale of 1 to 5, where 1 means strongly agree, 3 means neither agree nor disagree, and 5 means strongly disagree, please tell me what you think about the following statements:                                                |                                                                                                                                                                                                                                                                                                                                                 | <table border="1"> <thead> <tr> <th data-bbox="253 1104 789 1188"></th> <th data-bbox="789 1104 906 1188">1<br/>Strongly agree</th> <th data-bbox="906 1104 1021 1188">2<br/>Agree</th> <th data-bbox="1021 1104 1136 1188">3<br/>Neither</th> <th data-bbox="1136 1104 1252 1188">4<br/>Disagree</th> <th data-bbox="1252 1104 1365 1188">5<br/>Strongly disagree</th> </tr> </thead> <tbody> <tr> <td data-bbox="253 1188 789 1262">HIV providers can collect sputum for TB testing just as well as TB providers</td> <td></td> <td></td> <td></td> <td></td> <td></td> </tr> <tr> <td data-bbox="253 1262 789 1402">Asking HIV providers to provide and monitor TB treatment of their HIV-TB co-infected patients impacts negatively on the quality of HIV care and treatment</td> <td></td> <td></td> <td></td> <td></td> <td></td> </tr> <tr> <td data-bbox="253 1402 789 1543">Asking HIV providers to provide and monitor TB treatment of their HIV-TB co-infected patients improves TB care and treatment and TB outcome</td> <td></td> <td></td> <td></td> <td></td> <td></td> </tr> <tr> <td data-bbox="253 1543 789 1688">For infection control, it is better for HIV-TB co-infected patients to be treated for HIV in the HIV service and for TB in the TB service</td> <td></td> <td></td> <td></td> <td></td> <td></td> </tr> </tbody> </table> |               | 1<br>Strongly agree    | 2<br>Agree | 3<br>Neither | 4<br>Disagree | 5<br>Strongly disagree | HIV providers can collect sputum for TB testing just as well as TB providers |  |  |  |  |  | Asking HIV providers to provide and monitor TB treatment of their HIV-TB co-infected patients impacts negatively on the quality of HIV care and treatment |  |  |  |  |  | Asking HIV providers to provide and monitor TB treatment of their HIV-TB co-infected patients improves TB care and treatment and TB outcome |  |  |  |  |  | For infection control, it is better for HIV-TB co-infected patients to be treated for HIV in the HIV service and for TB in the TB service |  |  |  |  |  |
|                                                                                                                                                           | 1<br>Strongly agree                                                                                                                                                                                                                 | 2<br>Agree                                                                                                                                                                                                                                                                                                                                      | 3<br>Neither                                                                                                                                                                                                                                                                                                                                                                                                                                                                                                                                                                                                                                                                                                                                                                                                                                                                                                                                                                                                                                                                                                                                                                                                                                                                                                                                                  | 4<br>Disagree | 5<br>Strongly disagree |            |              |               |                        |                                                                              |  |  |  |  |  |                                                                                                                                                           |  |  |  |  |  |                                                                                                                                             |  |  |  |  |  |                                                                                                                                           |  |  |  |  |  |
| HIV providers can collect sputum for TB testing just as well as TB providers                                                                              |                                                                                                                                                                                                                                     |                                                                                                                                                                                                                                                                                                                                                 |                                                                                                                                                                                                                                                                                                                                                                                                                                                                                                                                                                                                                                                                                                                                                                                                                                                                                                                                                                                                                                                                                                                                                                                                                                                                                                                                                               |               |                        |            |              |               |                        |                                                                              |  |  |  |  |  |                                                                                                                                                           |  |  |  |  |  |                                                                                                                                             |  |  |  |  |  |                                                                                                                                           |  |  |  |  |  |
| Asking HIV providers to provide and monitor TB treatment of their HIV-TB co-infected patients impacts negatively on the quality of HIV care and treatment |                                                                                                                                                                                                                                     |                                                                                                                                                                                                                                                                                                                                                 |                                                                                                                                                                                                                                                                                                                                                                                                                                                                                                                                                                                                                                                                                                                                                                                                                                                                                                                                                                                                                                                                                                                                                                                                                                                                                                                                                               |               |                        |            |              |               |                        |                                                                              |  |  |  |  |  |                                                                                                                                                           |  |  |  |  |  |                                                                                                                                             |  |  |  |  |  |                                                                                                                                           |  |  |  |  |  |
| Asking HIV providers to provide and monitor TB treatment of their HIV-TB co-infected patients improves TB care and treatment and TB outcome               |                                                                                                                                                                                                                                     |                                                                                                                                                                                                                                                                                                                                                 |                                                                                                                                                                                                                                                                                                                                                                                                                                                                                                                                                                                                                                                                                                                                                                                                                                                                                                                                                                                                                                                                                                                                                                                                                                                                                                                                                               |               |                        |            |              |               |                        |                                                                              |  |  |  |  |  |                                                                                                                                                           |  |  |  |  |  |                                                                                                                                             |  |  |  |  |  |                                                                                                                                           |  |  |  |  |  |
| For infection control, it is better for HIV-TB co-infected patients to be treated for HIV in the HIV service and for TB in the TB service                 |                                                                                                                                                                                                                                     |                                                                                                                                                                                                                                                                                                                                                 |                                                                                                                                                                                                                                                                                                                                                                                                                                                                                                                                                                                                                                                                                                                                                                                                                                                                                                                                                                                                                                                                                                                                                                                                                                                                                                                                                               |               |                        |            |              |               |                        |                                                                              |  |  |  |  |  |                                                                                                                                                           |  |  |  |  |  |                                                                                                                                             |  |  |  |  |  |                                                                                                                                           |  |  |  |  |  |
| 45                                                                                                                                                        | In May and June last year (2015), this facility trained and equipped HIV providers to test their HIV patients for TB and treat their HIV-TB co-infected patients for TB? What are your opinions about this experience? (open-ended) |                                                                                                                                                                                                                                                                                                                                                 |                                                                                                                                                                                                                                                                                                                                                                                                                                                                                                                                                                                                                                                                                                                                                                                                                                                                                                                                                                                                                                                                                                                                                                                                                                                                                                                                                               |               |                        |            |              |               |                        |                                                                              |  |  |  |  |  |                                                                                                                                                           |  |  |  |  |  |                                                                                                                                             |  |  |  |  |  |                                                                                                                                           |  |  |  |  |  |

|    |                                                                                                                   |                                                        |  |
|----|-------------------------------------------------------------------------------------------------------------------|--------------------------------------------------------|--|
| 46 | Would you recommend that all facilities train and equip HIV providers to test their patients for TB?              | Yes..... 1<br>No .....2<br>Don't know/no opinion ....8 |  |
| 47 | Why is that? (open-ended)                                                                                         |                                                        |  |
| 48 | Would you recommend that all facilities train and equip HIV providers to treat their co-infected patients for TB? | Yes..... 1<br>No .....2<br>Don't know/no opinion ....8 |  |
| 49 | Why is that? (open-ended)                                                                                         |                                                        |  |
| 50 | Is there anything else about the experience of the last 10 months that you would like to share? (open-ended)      |                                                        |  |
| 51 | <b><i>THANK YOU FOR SPEAKING WITH ME TODAY!</i></b>                                                               |                                                        |  |
