# Supplementary material for: Improving management of tuberculosis in people living with HIV in South Africa through integration of HIV and tuberculosis services: a proof of concept study
Source: Springer Nature journal article supplement (doi:10.1186/s12913-018-3524-9), 2018-09-14
Supplement: MOESM1 [file 16125094]

## Additional file 1: Screening outcome

| Service provider                                                                              | Clinic 1                          |                | Clinic 2                       |                | Clinic 3                       |                | Total                          |                 |
|-----------------------------------------------------------------------------------------------|-----------------------------------|----------------|--------------------------------|----------------|--------------------------------|----------------|--------------------------------|-----------------|
|                                                                                               | HIV                               | TB             | HIV                            | TB             | HIV                            | TB             | HIV                            | TB              |
| <b>SCREENING – # screened for TB at the Clinic, total (n)</b>                                 | 971                               |                | 581                            |                | 303                            |                | 1855                           |                 |
| By provider (n, percentage of number screened for TB with known provider)                     | 154<br>(19.8%)                    | 623<br>(80.2%) | 177<br>(36.2%)                 | 312<br>(73.8%) | 106<br>(41.1%)                 | 152<br>(58.9%) | 437<br>(28.7%)                 | 1087<br>(71.3%) |
|                                                                                               | $X^2 = 149.6373$<br>$p < 0.00001$ |                |                                |                |                                |                |                                |                 |
| Unspecified provider (n, percentage of total number screened for TB)                          | 194<br>(20.0%)                    |                | 92<br>(15.8%)                  |                | 45<br>(14.9%)                  |                | 331<br>(17.8%)                 |                 |
| <b>TESTING – # tested<sup>1</sup> for TB, total (n, percentage of number screened for TB)</b> | 862<br>(85.7%)                    |                | 474<br>(81.6%)                 |                | 259<br>(85.5%)                 |                | 1595<br>(86.0%)                |                 |
|                                                                                               | $X^2 = 15.6735$<br>$p = 0.0004$   |                |                                |                |                                |                |                                |                 |
| By provider (n, percentage of number screened for TB by provider)                             | 127<br>(82.5%)                    | 544<br>(87.3%) | 139<br>(78.5%)                 | 251<br>(80.4%) | 88<br>(83.0%)                  | 129<br>(84.9%) | 354<br>(81.0%)                 | 924<br>(85.0%)  |
|                                                                                               | $X^2 = 2.4673$<br>$p = 0.1162$    |                | $X^2 = 0.2572$<br>$p = 0.6120$ |                | $X^2 = 0.1598$<br>$p = 0.6893$ |                | $X^2 = 3.6801$<br>$p = 0.0551$ |                 |
| Unspecified provider (n, percentage of number screened for TB unspecified provider)           | 191<br>(98.5%)                    |                | 84<br>(91.3%)                  |                | 42<br>(93.3%)                  |                | 317<br>(95.8%)                 |                 |
| <b>TB CASES – # TB positive, total (n, percentage of total number tested for TB)</b>          | 94<br>(10.9%)                     |                | 53<br>(11.2%)                  |                | 14<br>(5.4%)                   |                | 161<br>(10.1%)                 |                 |
|                                                                                               | $X^2 = 7.516$<br>$p = 0.0233$     |                |                                |                |                                |                |                                |                 |
| By provider (n, percentage of number tested for TB by provider)                               | 29<br>(22.8%)                     | 61<br>(11.2%)  | 21<br>(15.1%)                  | 30<br>(12.0%)  | 7<br>(8.0%)                    | 5<br>(3.9%)    | 57<br>(16.1%)                  | 96<br>(10.4%)   |
|                                                                                               | $X^2 = 11.9736$<br>$p = 0.0005$   |                | $X^2 = 0.7838$<br>$p = 0.3760$ |                | $X^2 = 1.6658$<br>$p = 0.1968$ |                | $X^2 = 7.9241$<br>$p = 0.0049$ |                 |
| Unspecified provider (n, percentage of number tested for TB unspecified provider)             | 4<br>(2.1%)                       |                | 2<br>(2.4%)                    |                | 2<br>(4.8%)                    |                | 8<br>(2.5%)                    |                 |

| Service provider                                                                          | Clinic 1                                            |               | Clinic 2                                            |               | Clinic 3      |              | Total                                               |               |
|-------------------------------------------------------------------------------------------|-----------------------------------------------------|---------------|-----------------------------------------------------|---------------|---------------|--------------|-----------------------------------------------------|---------------|
|                                                                                           | HIV                                                 | TB            | HIV                                                 | TB            | HIV           | TB           | HIV                                                 | TB            |
| <b>REGISTRATION – # registered for treatment, total (n, percentage of total TB cases)</b> | 73<br>(77.7%)                                       |               | 37<br>(69.8%)                                       |               | 11<br>(78.6%) |              | 121<br>(75.2%)                                      |               |
|                                                                                           |                                                     |               | X <sup>2</sup> = 1.2138<br>p = 0.5450 (p = 0.5267)* |               |               |              |                                                     |               |
| <b>By provider (n, percentage of number tested TB positive by provider)</b>               | 24<br>(82.8%)                                       | 49<br>(80.3%) | 13<br>(61.9%)                                       | 24<br>(80.0%) | 7<br>(100%)   | 4<br>(80.0%) | 44<br>(77.2%)                                       | 77<br>(80.2%) |
|                                                                                           | X <sup>2</sup> = 0.0758<br>p = 0.7830 (p = 1)*      |               | X <sup>2</sup> = 2.031<br>p = 0.1541 (p = 0.2069)*  |               | p = 0.4167*   |              | X <sup>2</sup> = 0.1966<br>p = 0.6575 (p = 0.6844)* |               |
| <b>TREATMENT STARTED – # treatment started, total (n, percentage of total TB cases)</b>   | 73<br>(76.8%)                                       |               | 35<br>(66.0%)                                       |               | 11<br>(78.6%) |              | 119<br>(73.9%)                                      |               |
|                                                                                           |                                                     |               | X <sup>2</sup> = 2.5466<br>p = 0.2799 (p = 0.3092)* |               |               |              |                                                     |               |
| <b>By provider (n, percentage of number tested TB positive by provider)</b>               | 24<br>(82.8%)                                       | 49<br>(80.3%) | 12<br>(57.1%)                                       | 23<br>(76.7%) | 7<br>(100%)   | 4<br>(80.0%) | 43<br>(75.4%)                                       | 76<br>(79.2%) |
|                                                                                           | X <sup>2</sup> = 0.0758<br>p = 0.7830 (p = 0.5138)* |               | X <sup>2</sup> = 2.187<br>p = 0.1392 (p = 0.1208)*  |               | p = 0.4167*   |              | X <sup>2</sup> = 0.2876<br>p = 0.5918 (p = 0.6881)* |               |
| <b>Started treatment within 2 weeks</b>                                                   | 18<br>(75.0%)                                       | 41<br>(83.7%) | 12<br>(100%)                                        | 22<br>(95.7%) | 5<br>(71.4%)  | 2<br>(50.0%) | 35<br>(81.4%)                                       | 65<br>(85.5%) |
|                                                                                           | X <sup>2</sup> = 0.7819<br>p = 0.3766 (p = 0.5276)* |               | p = 1*                                              |               | p = 0.5758*   |              | X <sup>2</sup> = 0.3493<br>p = 0.5545 (p = 0.6068)* |               |
| <b>DIED – No. died before treatment start (n, percentage of TB cases registered)</b>      | 0<br>(0.0%)                                         |               | 1<br>(2.7%)                                         |               | 0<br>(0.0%)   |              | 1<br>(0.8%)                                         |               |
| <b>UNKNOWN – No. unknown TB start (n, percentage of TB cases registered)</b>              | 0<br>(0.0%)                                         |               | 1<br>(2.7%)                                         |               | 0<br>(0.0%)   |              | 2<br>(0.8%)                                         |               |

<sup>1</sup>any laboratory test; \*Fisher's Exact Test (two-tailed)
