# Supplementary material for: Improving management of tuberculosis in people living with HIV in South Africa through integration of HIV and tuberculosis services: a proof of concept study
Source: Springer Nature journal article supplement (doi:10.1186/s12913-018-3524-9), 2018-09-14
Supplement: MOESM3 [file 16125094]

### Additional File 3. Treatment Outcome

|                                                                                 | Clinic 1                       |               | Clinic 2      |               | Clinic 3      |               | Total          |                |
|---------------------------------------------------------------------------------|--------------------------------|---------------|---------------|---------------|---------------|---------------|----------------|----------------|
|                                                                                 | HIV                            | TB            | HIV           | TB            | HIV           | TB            | HIV            | TB             |
| <b>Total TB cases on treatment for follow-up</b>                                | <b>122</b>                     |               | <b>67</b>     |               | <b>22</b>     |               | <b>211</b>     |                |
| <b>TB cases on Rx - identified by clinic (n, percentage of total TB cases)</b>  | 73<br>(59.8%)                  |               | 35<br>(52.2%) |               | 11<br>(50.0%) |               | 119<br>(56.4%) |                |
| <b>By provider (n, percentage of total TB cases by provider)</b>                | 24<br>(82.8%)                  | 49<br>(52.7%) | 12<br>(85.7%) | 23<br>(43.4%) | 7<br>(58.3%)  | 4<br>(40.0%)  | 43<br>(78.2%)  | 76<br>(48.7%)  |
| <b>TB cases on treatment - transferred-in (n, percentage of total TB cases)</b> | 49<br>(40.2%)                  |               | 32<br>(47.8%) |               | 11<br>(50.0%) |               | 92<br>(43.6%)  |                |
| <b>By provider (n, percentage of total TB cases by provider)</b>                | 5<br>(17.2%)                   | 44<br>(47.3%) | 2<br>(14.3%)  | 30<br>(56.6%) | 5<br>(41.7%)  | 6<br>(60.0%)  | 12<br>(21.8%)  | 80<br>(51.3%)  |
| <b>By provider (n, percentage of total TB cases by clinic)</b>                  | 29<br>(23.8%)                  | 93<br>(76.2%) | 14<br>(20.9%) | 53<br>(79.1%) | 12<br>(54.5%) | 10<br>(45.5%) | 55<br>(26.1%)  | 156<br>(73.9%) |
|                                                                                 | $X^2 = 10.522$<br>$p = 0.0052$ |               |               |               |               |               |                |                |
| <b>Outcome Intensive Phase<sup>1</sup></b>                                      |                                |               |               |               |               |               |                |                |
| <b>Still on Intensive phase</b>                                                 | 0<br>(0.0%)                    | 0<br>(0.0%)   | 0<br>(0.0%)   | 2<br>(3.8%)   | 0<br>(0.0%)   | 0<br>(0.0%)   | 0<br>(0.0%)    | 2<br>(1.3%)    |
| <b>Unknown (incomplete data)</b>                                                | 1<br>(3.4%)                    | 4<br>(4.3%)   | 2<br>(14.2%)  | 2<br>(3.8%)   | 0<br>(0.0%)   | 0<br>(0.0%)   | 3<br>(5.5%)    | 6<br>(3.8%)    |
| <b>Completed Intensive Phase</b>                                                | 23<br>(82.1%)                  | 75<br>(84.3%) | 10<br>(83.3%) | 42<br>(85.7%) | 5<br>(41.7%)  | 6<br>(60.0%)  | 38<br>(73.1%)  | 123<br>(83.1%) |
|                                                                                 | $X^2 = 2.4667$<br>$p = 0.1163$ |               |               |               |               |               |                |                |
| <b>Stopped</b>                                                                  | 0<br>(0.0%)                    | 0<br>(0.0%)   | 0<br>(0.0%)   | 0<br>(0.0%)   | 0<br>(0.0%)   | 0<br>(0.0%)   | 0<br>(0.0%)    | 0<br>(0.0%)    |
| <b>Defaulted</b>                                                                | 2<br>(7.1%)                    | 5<br>(5.6%)   | 0<br>(0.0%)   | 0<br>(0.0%)   | 6<br>(50.0%)  | 1<br>(10.0%)  | 8<br>(15.4%)   | 6<br>(4.1%)    |

|                                                                                 | Clinic 1                              |               | Clinic 2                                                   |               | Clinic 3                                            |              | Total                                 |                                                           |
|---------------------------------------------------------------------------------|---------------------------------------|---------------|------------------------------------------------------------|---------------|-----------------------------------------------------|--------------|---------------------------------------|-----------------------------------------------------------|
|                                                                                 | HIV                                   | TB            | HIV                                                        | TB            | HIV                                                 | TB           | HIV                                   | TB                                                        |
|                                                                                 |                                       |               |                                                            |               |                                                     |              |                                       |                                                           |
|                                                                                 |                                       |               |                                                            |               |                                                     |              |                                       | p = 0.0104*                                               |
| <b>Transferred out</b>                                                          | 2<br>(7.1%)                           | 4<br>(4.5%)   | 1<br>(8.3%)                                                | 0<br>(0.0%)   | 0<br>(0.0%)                                         | 1<br>(10.0%) | 3<br>(5.8%)                           | 5<br>(3.4%)                                               |
| <b>Died</b>                                                                     | 1<br>(3.6%)                           | 5<br>(5.6%)   | 1<br>(8.3%)                                                | 7<br>(14.3%)  | 1<br>(8.3%)                                         | 2<br>(20.0%) | 3<br>(5.8%)                           | 14<br>(9.5%)                                              |
|                                                                                 |                                       |               |                                                            |               |                                                     |              |                                       | p = 0.5673*                                               |
|                                                                                 |                                       |               |                                                            |               |                                                     |              |                                       | X <sup>2</sup> = 8.705<br><b>p = 0.0335 (p = 0.0372)*</b> |
|                                                                                 |                                       |               |                                                            |               |                                                     |              |                                       |                                                           |
| <b>End-of-Intensive Phase test (completed IP only)</b>                          |                                       |               |                                                            |               |                                                     |              |                                       |                                                           |
| <b>&gt;=30 days and &lt;60 days of IP (n, percentage of cases completed IP)</b> | 11<br>(47.8%)                         | 48<br>(64.0%) | 4<br>(40.0%)                                               | 19<br>(45.2%) | 2<br>(40.0%)                                        | 1<br>(16.7%) | 17<br>(44.7%)                         | 68<br>(55.3%)                                             |
|                                                                                 | X <sup>2</sup> = 1.9219<br>p = 0.1656 |               | X <sup>2</sup> = 0.0898<br>p = 0.7644                      |               | X <sup>2</sup> = 0.7486<br>p = 0.3869 (p = 0.5455)* |              | X <sup>2</sup> = 1.296<br>p = 0.2549  |                                                           |
|                                                                                 |                                       |               |                                                            |               |                                                     |              |                                       |                                                           |
| <b>Outcome Overall treatment<sup>2</sup></b>                                    |                                       |               |                                                            |               |                                                     |              |                                       |                                                           |
| <b>Started TB Rx &gt;=180 days ago (n, percentage of total TB cases)</b>        | 93<br>(76.2%)                         |               | 41<br>(61.2%)                                              |               | 14<br>(63.6%)                                       |              | 148<br>(70.1%)                        |                                                           |
|                                                                                 |                                       |               | X <sup>2</sup> = 5.1648<br>p = 0.0756                      |               |                                                     |              |                                       |                                                           |
|                                                                                 |                                       |               |                                                            |               |                                                     |              |                                       |                                                           |
| <b>By provider (n, percentage of total TB cases by provider)</b>                | 22<br>(75.9%)                         | 71<br>(76.3%) | 3<br>(21.4%)                                               | 38<br>(71.7%) | 9<br>(75.0%)                                        | 5<br>(50.0%) | 34<br>(61.8%)                         | 114<br>(73.1%)                                            |
|                                                                                 | X <sup>2</sup> = 0.0028<br>p = 0.9575 |               | X <sup>2</sup> = 11.785<br><b>p = 0.0006 (p = 0.0009)*</b> |               | X <sup>2</sup> = 1.4732<br>p = 0.2248 (p = 0.3777)* |              | X <sup>2</sup> = 2.4612<br>p = 0.1167 |                                                           |
|                                                                                 |                                       |               |                                                            |               |                                                     |              |                                       |                                                           |
| <b>Still on Continuation phase</b>                                              | 0<br>(0.0%)                           | 0<br>(0.0%)   | 1<br>(33.3%)                                               | 9<br>(23.1%)  | 0<br>(0.0%)                                         | 0<br>(0.0%)  | 1<br>(1.5)                            | 9<br>(7.9%)                                               |
| <b>Unknown</b>                                                                  | 2<br>(9.1%)                           | 3<br>(4.2%)   | 0<br>(0.0%)                                                | 1<br>(2.6%)   | 0<br>(0.0%)                                         | 0<br>(0.0%)  | 2<br>(2.9)                            | 4<br>(3.5%)                                               |

|                                                             | Clinic 1                                           |               | Clinic 2                                           |               | Clinic 3                                           |              | Total                                              |               |
|-------------------------------------------------------------|----------------------------------------------------|---------------|----------------------------------------------------|---------------|----------------------------------------------------|--------------|----------------------------------------------------|---------------|
|                                                             | HIV                                                | TB            | HIV                                                | TB            | HIV                                                | TB           | HIV                                                | TB            |
| <b>Completed/cure</b>                                       | 14<br>(70.0%)                                      | 51<br>(75.0%) | 0<br>(0.0%)                                        | 14<br>(50.0%) | 2<br>(22.2%)                                       | 4<br>(80.0%) | 16<br>(53.3%)                                      | 69<br>(68.3%) |
| <b>Stopped</b>                                              | 0<br>(0.0%)                                        | 0<br>(0.0%)   | 0<br>(0.0%)                                        | 0<br>(0.0%)   | 0<br>(0.0%)                                        | 0<br>(0.0%)  | 0<br>(0.0%)                                        | 0<br>(0.0%)   |
| <b>Defaulted</b>                                            | 3<br>(15.0%)                                       | 9<br>(13.2%)  | 1<br>(50.0%)                                       | 1<br>(3.6%)   | 6<br>(66.6%)                                       | 0<br>(0.0%)  | 10<br>(33.3%)                                      | 10<br>(9.9%)  |
| <b>Transferred out</b>                                      | 2<br>(10.0%)                                       | 4<br>(5.9%)   | 0<br>(0.0%)                                        | 6<br>(21.4%)  | 1<br>(11.1%)                                       | 0<br>(0.0%)  | 3<br>(10.0%)                                       | 10<br>(9.9%)  |
| <b>Died</b>                                                 | 1<br>(5.0%)                                        | 4<br>(5.9%)   | 1<br>(50.0%)                                       | 7<br>(25.0%)  | 0<br>(0.0%)                                        | 1<br>(20.0%) | 2<br>(6.7%)                                        | 12<br>(11.9%) |
|                                                             | X <sup>2</sup> = 0.493<br>p = 0.9204 (p = 0.8640)* |               | X <sup>2</sup> = 7.902<br>p = 0.0481 (p = 0.0827)* |               | X <sup>2</sup> = 8.193<br>p = 0.0422 (p = 0.0210)* |              | X <sup>2</sup> = 9.513<br>p = 0.0232 (p = 0.0319)* |               |
| <b>End-of-Continuation phase test (completed/cure only)</b> |                                                    |               |                                                    |               |                                                    |              |                                                    |               |
| <b>&gt;=60 days of CP (n, percentage of completed/cure)</b> | 11<br>(78.6%)                                      | 45<br>(88.2%) | -                                                  | 4<br>(28.6%)  | 2<br>(100%)                                        | 3<br>(75.0%) | 13<br>(81.3%)                                      | 52<br>(75.4%) |
|                                                             | p = 0.3915*                                        |               | -                                                  | p = 1*        |                                                    | p = 0.7510*  |                                                    |               |

<sup>1</sup> Patients who started TB treatment at least 60 days before the end of the assessment; <sup>2</sup> Patients who started TB treatment at least 180 days before the end of the assessment; \* Fisher's Exact test (two tailed)
